# Supplementary material for: Chitosan Encapsulated Meloxicam Nanoparticles for Sustained Drug Delivery Applications: Preparation, Characterization, and Pharmacokinetics in Wistar Rats
Source: MDPI journal article supplement (doi:10.3390/molecules27217312), 2022-10-27
Supplement: s1 [file molecules-1913647-supplementary.pdf › molecules-1913647-supplementary.pdf]

**Supplementary Table S1.** Elemental distribution obtained from EDS analysis of CEMNPs.

| Element | Weight% | Atomic% |
|---------|---------|---------|
| C K     | 68.10   | 76.19   |
| N K     | 10.19   | 9.78    |
| O K     | 11.73   | 9.85    |
| S K     | 9.99    | 4.19    |
| Totals  | 100.00  |         |
